# Supplementary material
Source: PubMed Central journal article supplement (PMC4514578)
Supplement: NIHMS694288-supplement-1.pdf [file NIHMS694288-supplement-1.pdf]

**Online Table I. Ratio of LDL/HDL in male mice infused with AngII for 28 days**

| Mouse Strain     | Normal Diet | Western Diet | P Value |
|------------------|-------------|--------------|---------|
| C57BL/6          | 0.15 ± 0.02 | 0.12 ± 0.02  | 0.33    |
| LDL Receptor -/- | 1.38 ± 0.21 | 2.98 ± 0.35  | 0.004   |

# Online Figure I

## Male LDL receptor $-/-$ Mice Fed Normal Diet

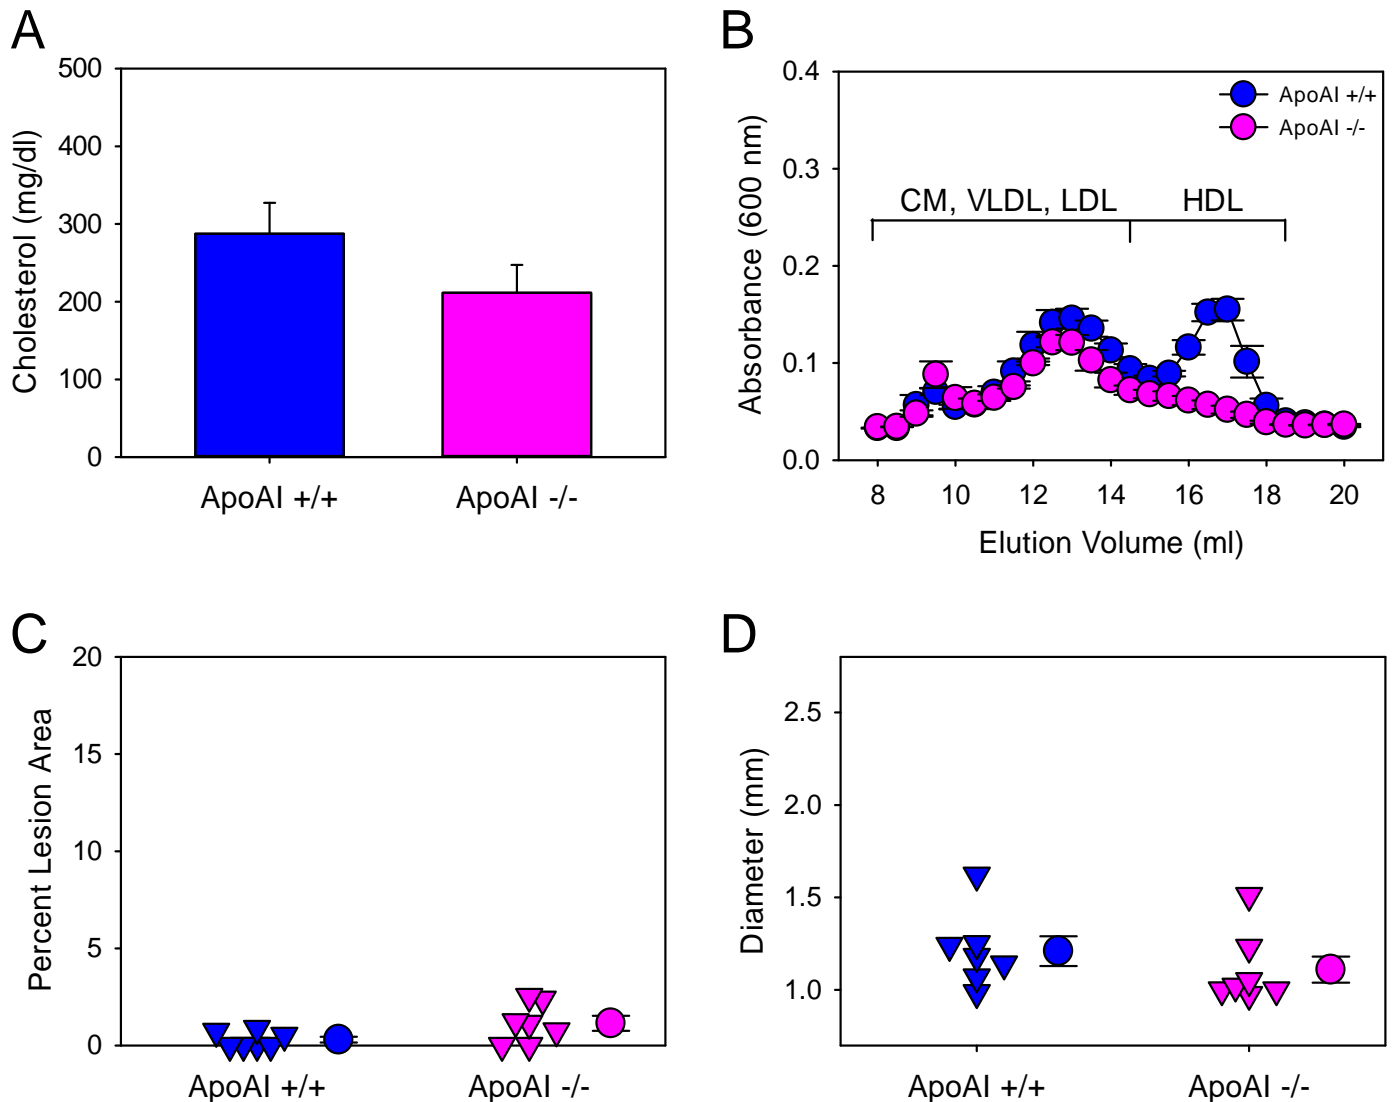

**Figure I. Deficiency of ApoAI had no effect on AngII-induced AAAs in male LDL receptor  $-/-$  mice fed normal diet.** (A) Plasma cholesterol concentrations. Histograms are means and error bars represent SEM. N=5-6 per group. (B) Plasma lipoprotein distributions resolved by size exclusion chromatography. Circles and error bars are means  $\pm$  SEM. N=3 per group. (C) Percent atherosclerotic lesion area in the aortic arch regions. (D) Maximal outer diameters of suprarenal aortas. Triangles are values from individual mice, and circles represent means and error bars represent SEM (C and D).

# Online Figure II

## Male LDL receptor -/- Mice Fed Western Diet

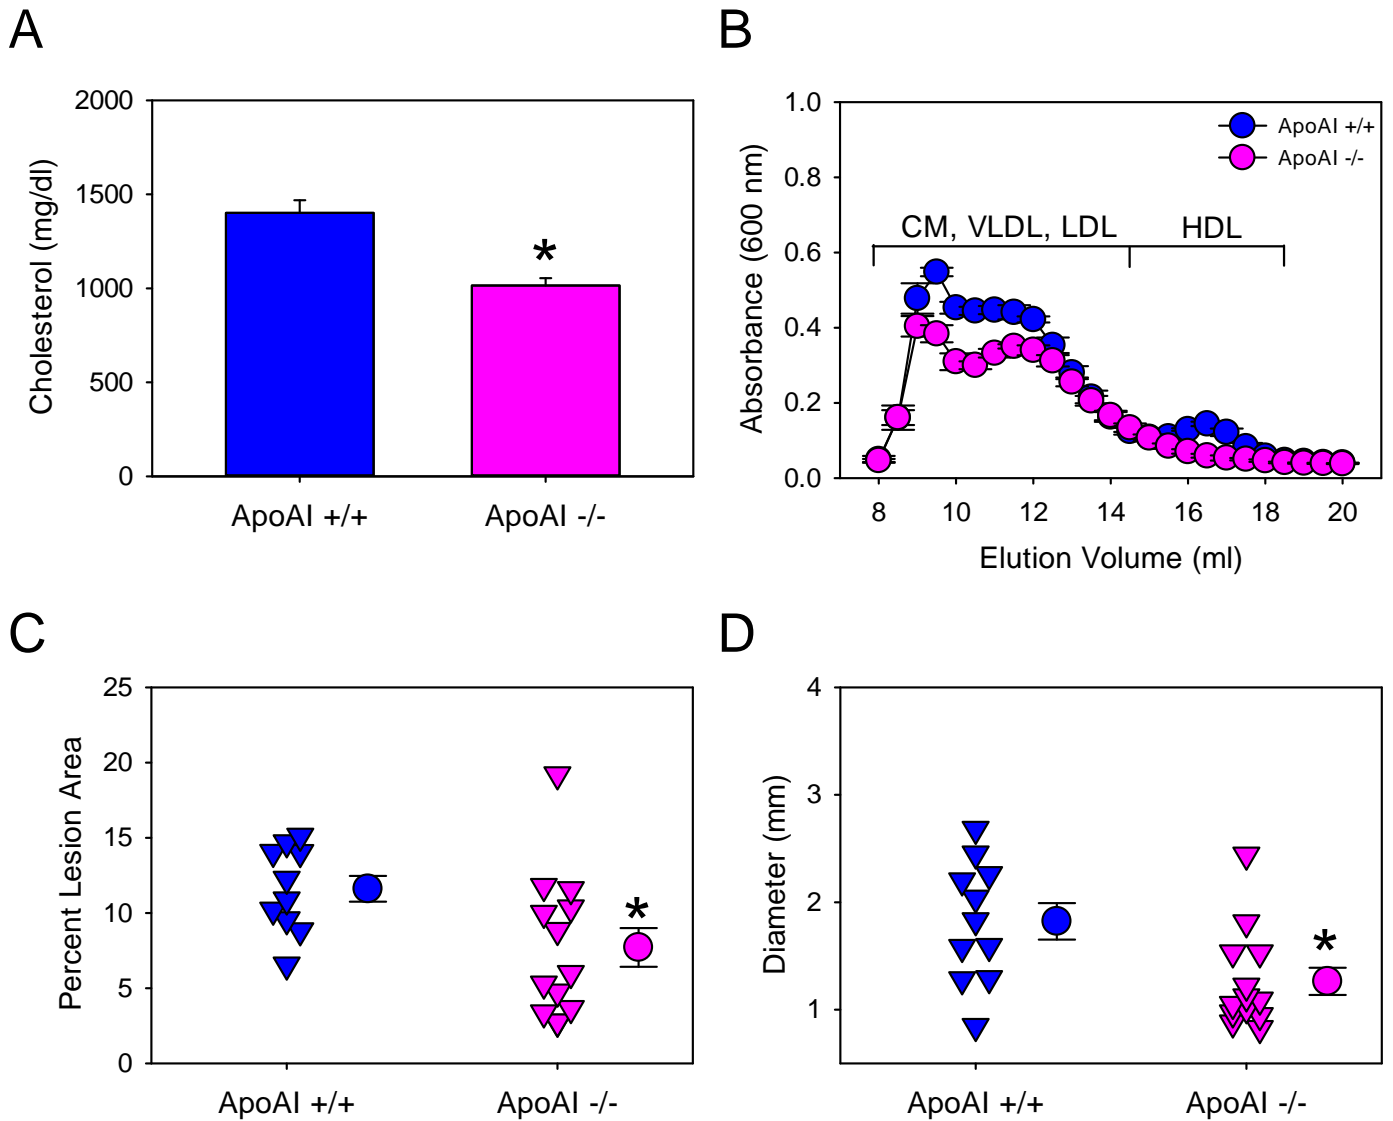

**Figure II. Deficiency of ApoAI did not exacerbate AngII-induced AAAs in male LDL receptor -/- mice fed Western diet.** (A) Plasma cholesterol concentrations. Histograms are means and error bars represent SEM. N=11-13 per group. \* denotes  $P < 0.001$  by Mann-Whitney Rank Sum Test. (B) Plasma lipoprotein distributions resolved by size exclusion chromatography. Circles and error bars are means  $\pm$  SEM. N=4-5 per group. (C) Percent atherosclerotic lesion area in the aortic arch regions. N=10-13 per group. \* denotes  $P=0.03$  by Student's t test. (D) Maximal outer widths of suprarenal aortas. N=11-13 per group. \* denotes  $P=0.01$  by Mann-Whitney Rank Sum Test. Triangles are values from individual mice, and circles represent means and error bars represent SEM (C and D).

# Online Figure III

## Female LDL Receptor $-/-$ Mice Fed Normal versus Western Diet

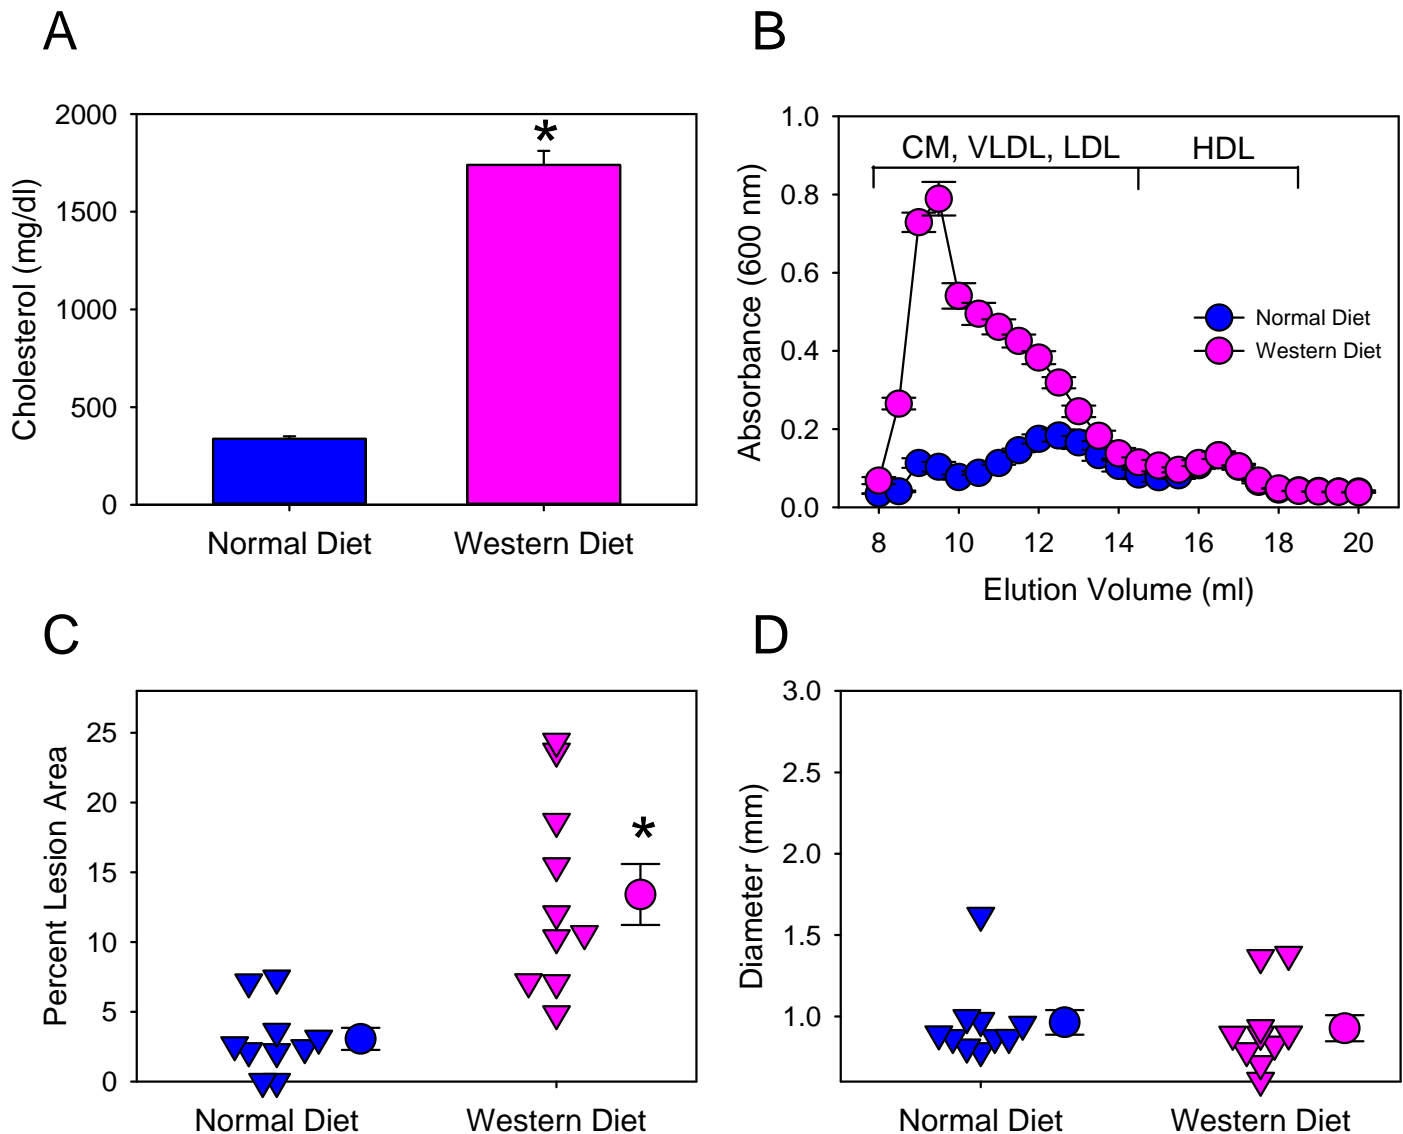

**Figure III. Hypercholesterolemia did not increase AngII-induced AAA formation in female LDL receptor  $-/-$  mice.** (A) Plasma cholesterol concentrations. Histobars are means and error bars represent SEM. N=10 per group. \* denotes  $P < 0.001$  by Student's t test. (B) Plasma lipoprotein distributions resolved by size exclusion chromatography. Circles and error bars are means  $\pm$  SEM. N=5-7 per group. (C) Atherosclerosis in the aortic arch regions. N=10 per group. \* denotes  $P < 0.001$  by Mann-Whitney Rank Sum Test. (D) Maximal outer diameters of suprarenal aortas. N=10 per group. Triangles are values from individual mice. Circles represent means and error bars represent SEM (C and D).
